# Supplementary material
Source: publisher figshare collection journal article supplement (https://frontiersin.figshare.com/ndownloader/files/26797886)
Supplement: Supplementary file [file 26797886]

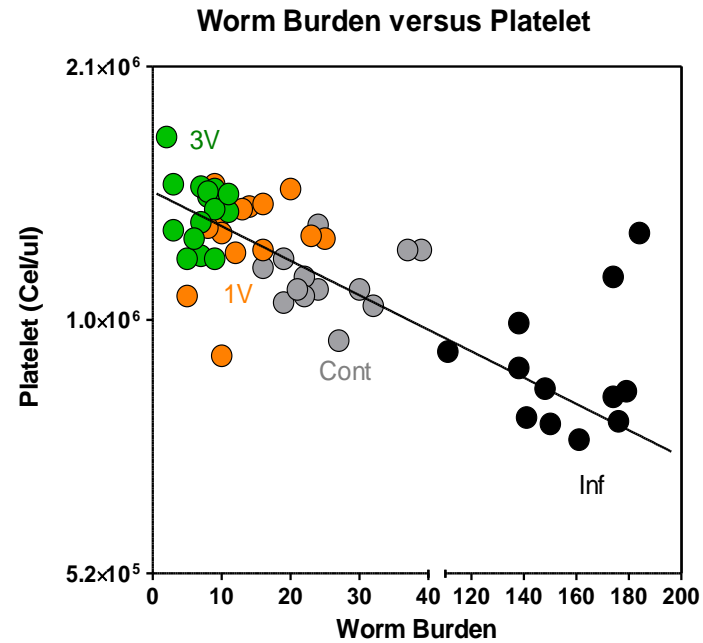

**Supplementary Figure 9.** Platelets versus Worm Burden. A negative Pearson's correlation between Platelet counts at Day 28 and worm burden at experiment termination was observed analyzing the different groups together ( $p < 0.0001$ ;  $r = -0.666$ ).
